# Supplementary material for: The seminal odorant binding protein Obp56g is required for mating plug formation and male fertility in Drosophila melanogaster
Source: eLife. 2023 Dec 21;12:e86409. doi: 10.7554/eLife.86409 (PMC10834028; doi:10.7554/eLife.86409)
Supplement: Figure 1—figure supplement 1—source data 1. [file elife-86409-fig1-figsupp1-data1.xlsx]

## Sheet: Sheet1
Male genotype	Remated-yes	Remated-no	Percent yes	Percent no
Obp56gRNAi/+	6	27	18.18	81.82
Tub-GAL4>Obp56gRNAi	21	5	80.77	19.23
