# Supplementary material for: The seminal odorant binding protein Obp56g is required for mating plug formation and male fertility in Drosophila melanogaster
Source: eLife. 2023 Dec 21;12:e86409. doi: 10.7554/eLife.86409 (PMC10834028; doi:10.7554/eLife.86409)
Supplement: Figure 1—figure supplement 2—source data 1. [file elife-86409-fig1-figsupp2-data1.xlsx]

## Sheet: Sheet1
Male genotype	Remated yes	Remated no	Percent yes	Percent no	MP present	MP absent	Percent MP present	Percent MP absent
CrebAGAL4/+	7	46	13.2075	86.7925	38	1	97.4359	2.5641
CrebAGAL4/Obp56gRNAi	39	20	66.1017	33.8983	2	34	5.55556	94.4444
