# Supplementary material for: The seminal odorant binding protein Obp56g is required for mating plug formation and male fertility in Drosophila melanogaster
Source: eLife. 2023 Dec 21;12:e86409. doi: 10.7554/eLife.86409 (PMC10834028; doi:10.7554/eLife.86409)
Supplement: Figure 1—source data 1. [file elife-86409-fig1-data1.xlsx]

## Sheet: Sheet1
Male genotype	Remated-yes	Remated-no	% yes	% no
Df(2R)/+	5	55	8.33333	91.6667
CyO/+	4	61	6.15385	93.8462
Obp56g1/CyO	3	62	4.61538	95.3846
Obp56g1/Df(2R)	42	23	64.6154	35.3846
