# Supplementary material for: The seminal odorant binding protein Obp56g is required for mating plug formation and male fertility in Drosophila melanogaster
Source: eLife. 2023 Dec 21;12:e86409. doi: 10.7554/eLife.86409 (PMC10834028; doi:10.7554/eLife.86409)
Supplement: Figure 2—figure supplement 2—source data 1. [file elife-86409-fig2-figsupp2-data1.xlsx]

## Sheet: Sheet1
Male genotype	Remated yes	Remated no	Percent yes	Percent no
Obp56i_hom_mut	11	25	30.5556	69.4444
Obp56i_het	6	33	15.3846	84.6154
Obp56i_hom_wt	11	27	28.9474	71.0526
Obp56f_hom_mut	8	32	20	80
Obp56f_het	6	32	15.7895	84.2105
Obp56f_hom_wt	7	30	18.9189	81.0811
Obp22a_hom_mut	11	30	26.8293	73.1707
Obp22a_het	5	37	11.9048	88.0952
Obp22a_hom_wt	11	27	28.9474	71.0526
Obp56e_hom_mut	5	31	13.8889	86.1111
Obp56e_het	1	41	2.38095	97.619
Obp56e_hom_wt	4	33	10.8108	89.1892
Obp51a_hom_mut	4	33	10.8108	89.1892
Obp51a_het	8	34	19.0476	80.9524
Obp51a_hom_wt	8	31	20.5128	79.4872
