# Supplementary material for: The seminal odorant binding protein Obp56g is required for mating plug formation and male fertility in Drosophila melanogaster
Source: eLife. 2023 Dec 21;12:e86409. doi: 10.7554/eLife.86409 (PMC10834028; doi:10.7554/eLife.86409)
Supplement: Figure 2—source data 1. [file elife-86409-fig2-data1.xlsx]

## Sheet: Sheet1
Male genotype	Remated-yes	Remated-no	% yes	% no
Obp56i_CyO	12	31	27.907	72.093
Obp56i_KO	9	37	19.5652	80.4348
Obp51a_CyO	7	30	18.9189	81.0811
Obp51a_KO	12	39	23.5294	76.4706
Obp56e_CyO	3	36	7.69231	92.3077
Obp56e_KO	4	34	10.5263	89.4737
Obp22a_CyO	1	27	3.57143	96.4286
Obp22a_KO	3	36	7.69231	92.3077
Obp56f_CyO	10	33	23.2558	76.7442
Obp56f_KO	7	38	15.5556	84.4444
Obp8a_WT	18	29	38.2979	61.7021
Obp8a_KO	2	42	4.54545	95.4545
