# Supplementary material for: The seminal odorant binding protein Obp56g is required for mating plug formation and male fertility in Drosophila melanogaster
Source: eLife. 2023 Dec 21;12:e86409. doi: 10.7554/eLife.86409 (PMC10834028; doi:10.7554/eLife.86409)
Supplement: Figure 4—source data 1. [file elife-86409-fig4-data1.xlsx]

## Sheet: Sheet1
Male genotype	MP&SM present	MP&SM absent	MP absent, SM present	Percent MP&SM present	Percent MP&SM absent	Percent MP absent, SM present
Obp56g1/CyO	34	0	1	97.14	0	2.86
Obp56g1	0	8	30	0	21.05	78.95
