# Supplementary figures and images for: Arithmetic with the two-dimensional logarithmic number system (2dlns)
Source: eLife journal article supplement (doi:10.7554/elife.86409), 2011-01-01

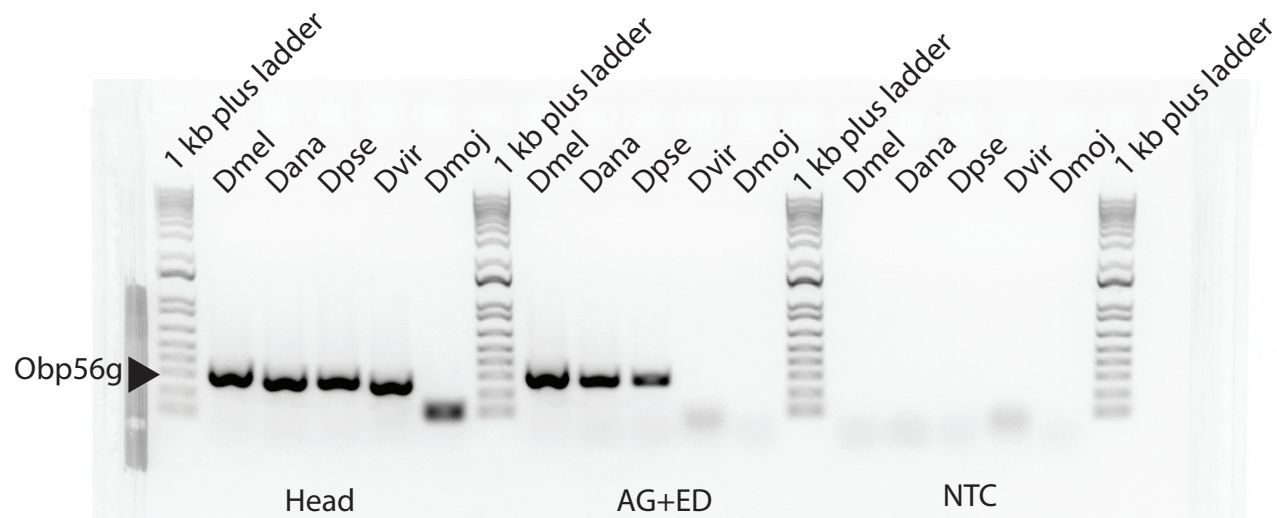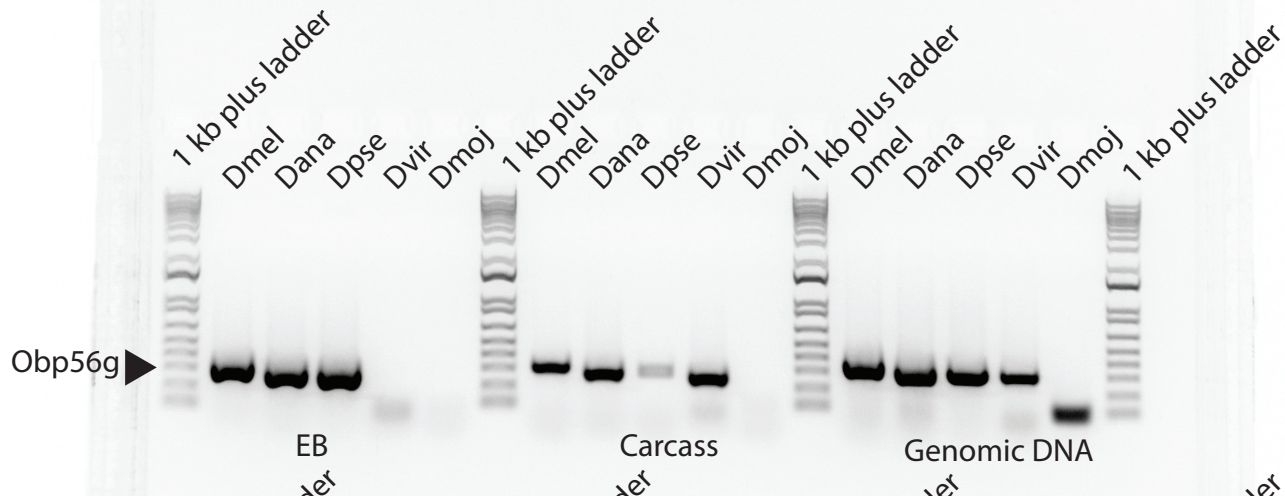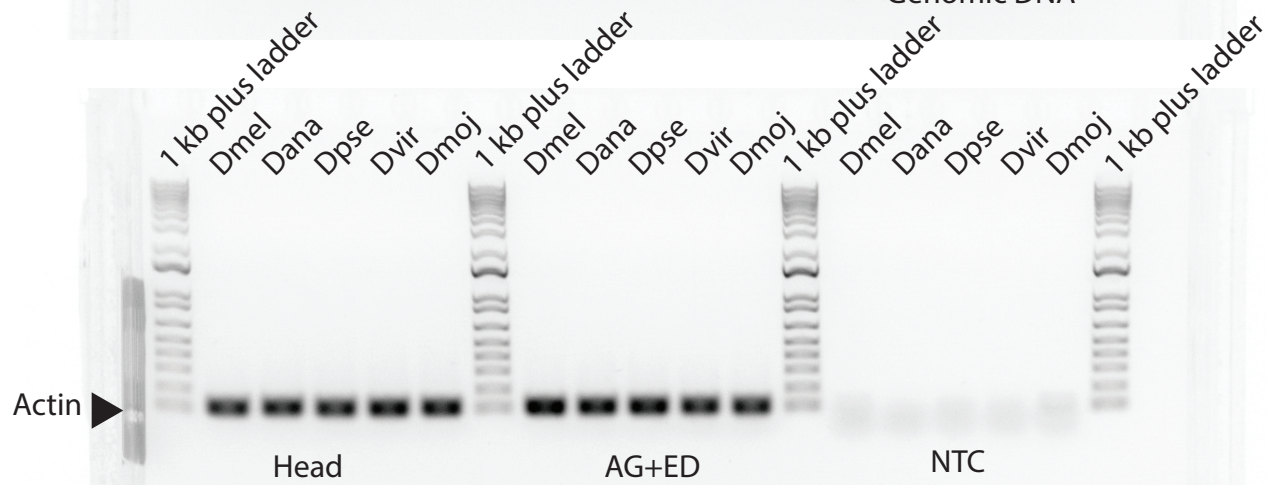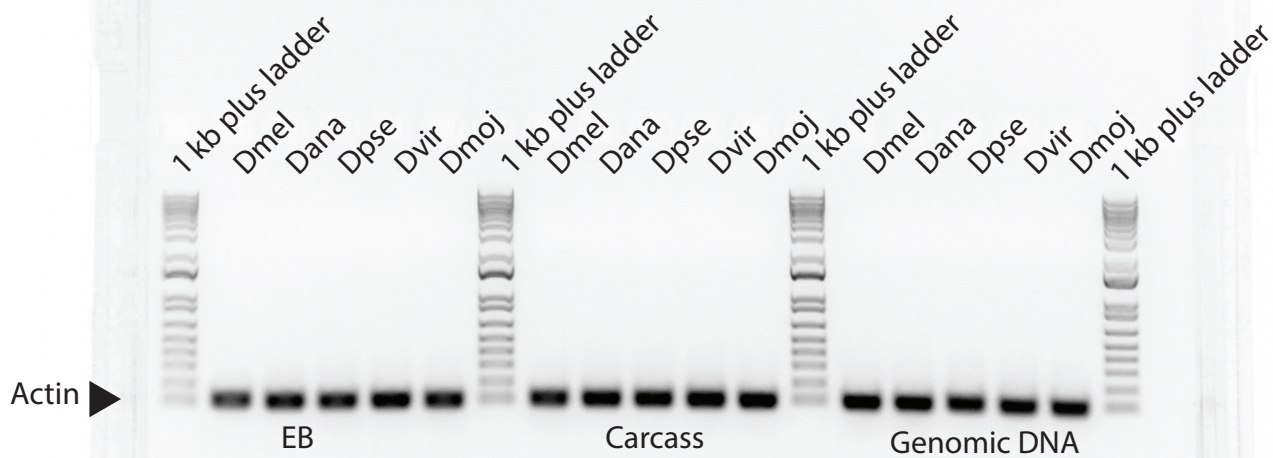

Supplement: supp [file elife-86409-supp-v1.zip]
